# Supplementary material
Source: PubMed Central journal article supplement (PMC4583322)
Supplement: NIHMS665028-supplement-supplement_1.pdf [file NIHMS665028-supplement-supplement_1.pdf]

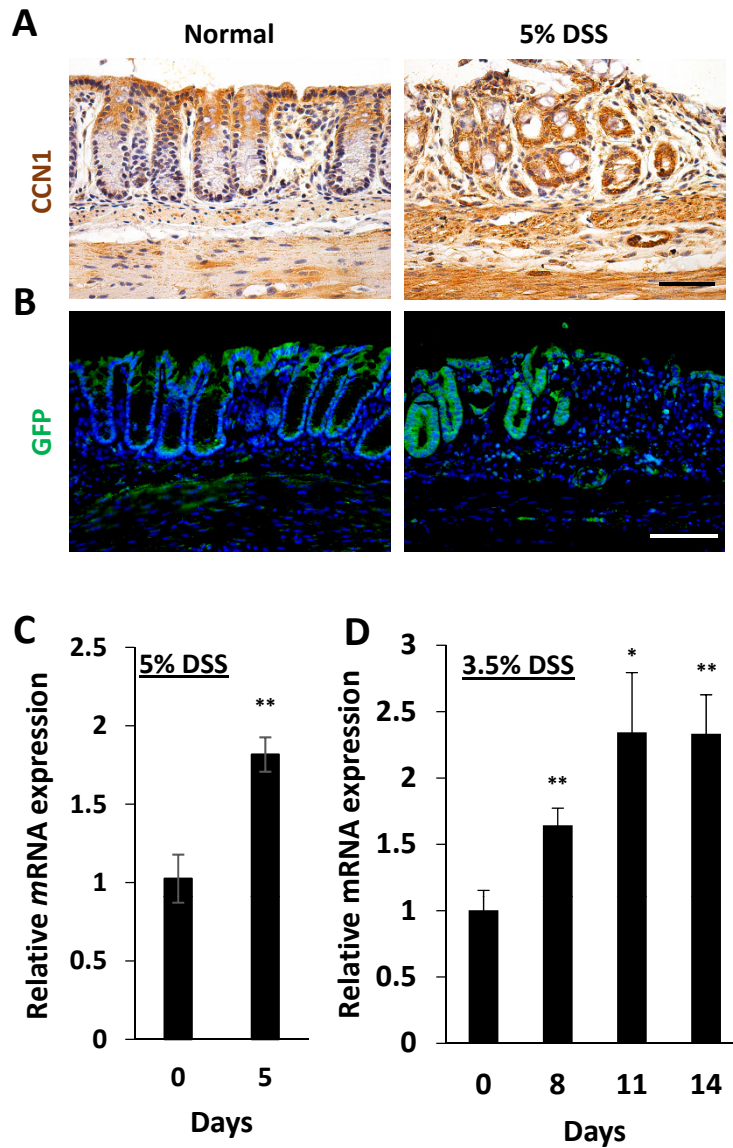

### Supplementary Figure S1. CCN1 expression is increased in murine colitis.

(A) Distal colon sections of untreated and 5% DSS-challenged wild type mice were stained for CCN1 by immunohistochemistry to evaluate CCN1 expression and localization. Colonic sections were counterstained with hematoxylin. Scale bar=50  $\mu$ m. (B) GFP immunofluorescence microscopy was performed in normal and DSS-challenged CCN1-EGFP colons and counterstained with DAPI. Scale bar=100  $\mu$ m. *Ccn1* mRNA in the colon of wild type mice challenged with (C) 5% DSS or (D) 3.5% DSS for 5 days was measured by qRT-PCR at indicated times, and normalized to healthy wild type colon with *cyclophilin E* as internal reference. Sequences of primers used are shown in supplementary table 1. Data shown as mean  $\pm$  SD;  $n=3$ ; \* $P < 0.01$ .

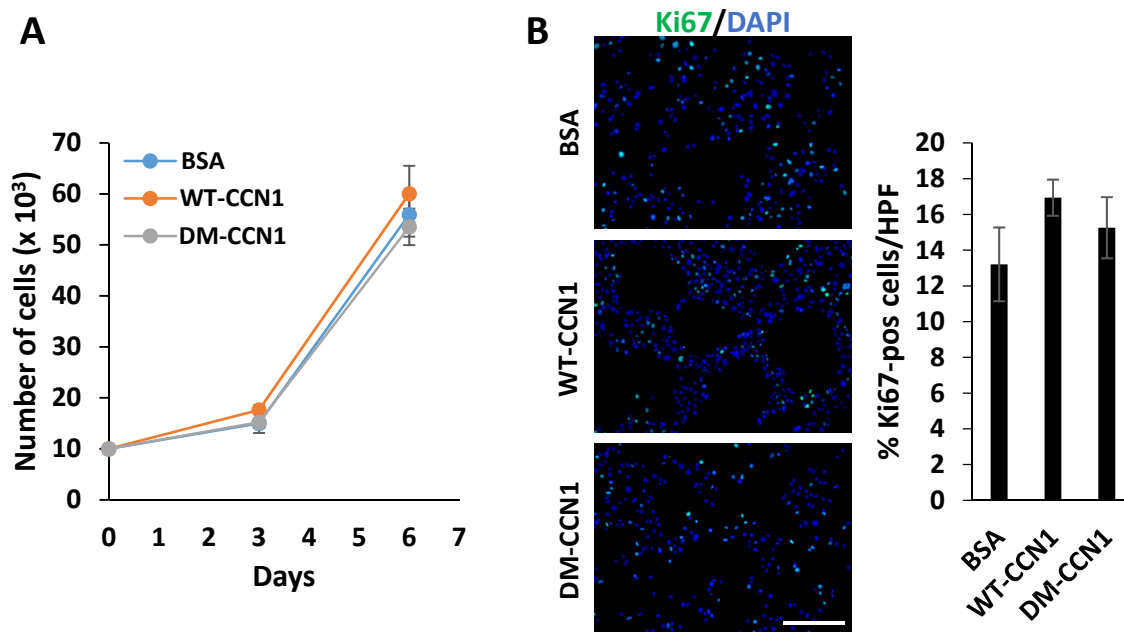

**Supplementary Figure S2. CCN1 does not directly induce IEC proliferation.**

YAMC cells were grown in presence of 10  $\mu\text{g/ml}$  of BSA, WT-CCN1, or DM-CCN1 for indicated days in culture. (A) Cells were trypsinized, stained with 1% trypan blue and counted using a hemocytometer. (B) Cells were treated with BSA, WT-CCN1, or DM-CCN1 for 24 hrs and immunostained for Ki67. Number of Ki67-positive cells were counted and normalized to the total number of cells (right). Data shown as mean  $\pm$  SD of triplicate experiments.

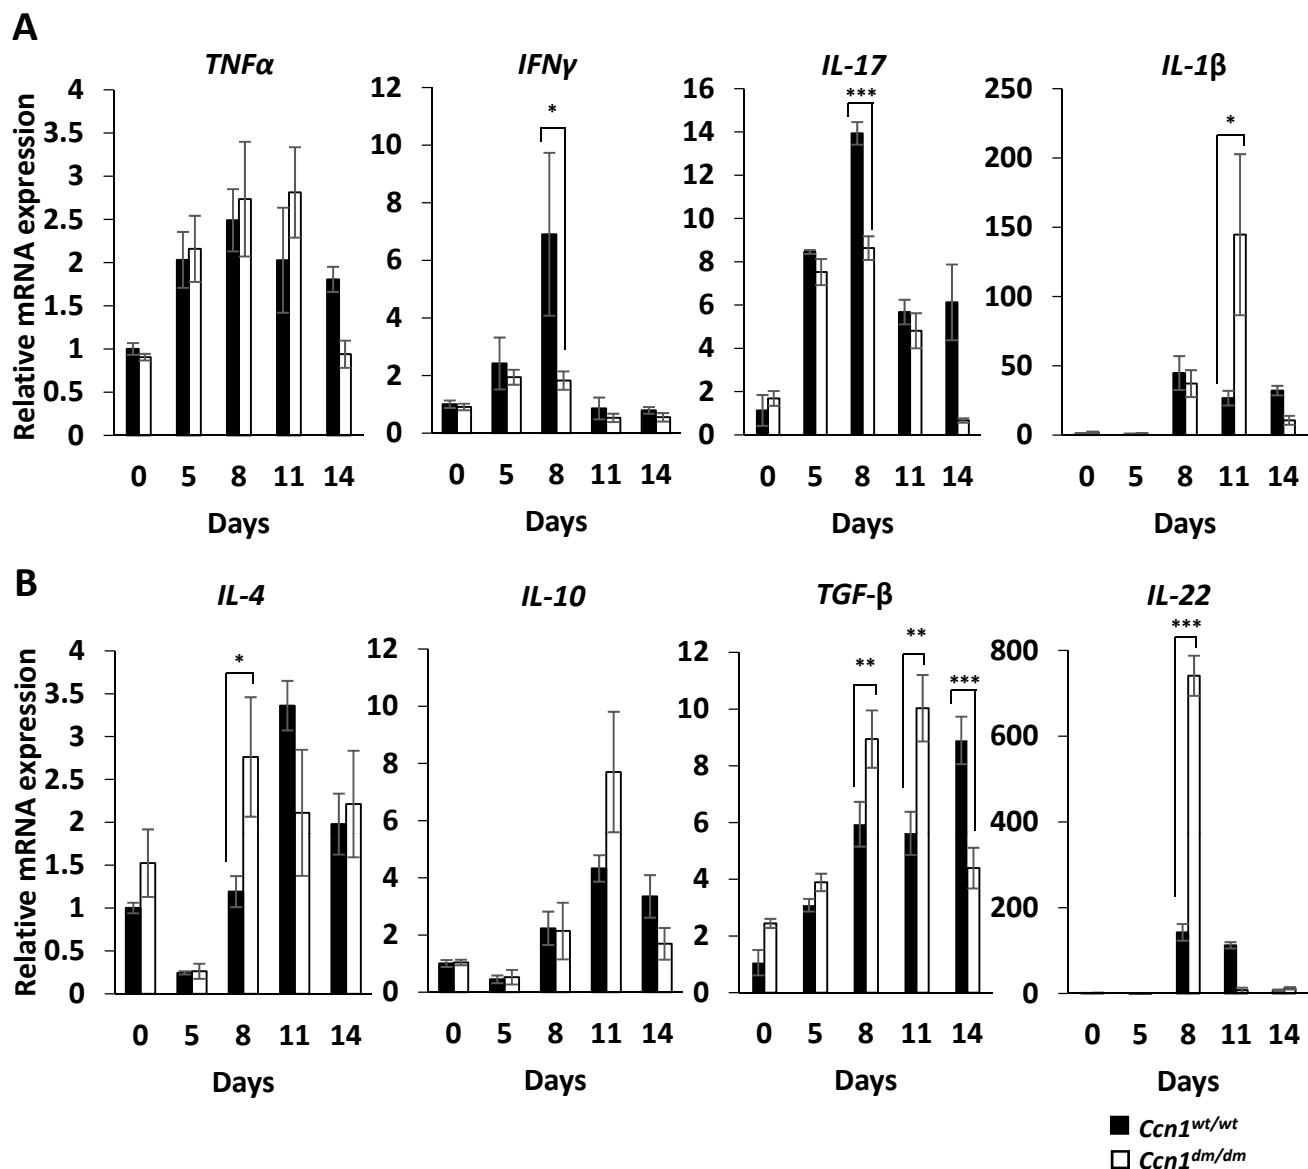

**Supplementary Figure S3. Cytokine expression in DSS-challenged wild type and *Ccn1*<sup>dm/dm</sup> mice.** (A) Pro-inflammatory (*TNF $\alpha$* , *IFN $\gamma$* , *IL-17*, *IL-1 $\beta$* ) and (B) anti-inflammatory (*IL-4*, *IL-10*, *TGF- $\beta$* ) cytokines, and mucosal healing (*IL-22*) gene expression was measured on day 5, 8, 11 and 14 from isolated colon RNA of 3.5% DSS-challenged wild type and *Ccn1*<sup>dm/dm</sup> mice by qRT-PCR. Sequences of primers used are shown in supplementary table 1. Data are represented as mean  $\pm$  SD;  $n=3-4$ ; \* $p<0.05$ , \*\* $p<0.01$ , \*\*\* $p<0.001$ .

| <b>Gene</b> | <b>qPCR Sense Primer (5' to 3')</b> | <b>qPCR Antisense Primer (5' to 3')</b> |
|-------------|-------------------------------------|-----------------------------------------|
| <i>Tnfa</i> | CATCTTCTCAAATTCGAGTGACAA            | TGGGAGTAGACAAGGTACAACCC                 |
| <i>Ifny</i> | TCAAGTGGCATAGATGTGGAAGAA            | TGGCTCTGCAGGATTTTCATG                   |
| <i>Il17</i> | ACCGCAATGAAGACCCTGAT                | TCCCTCCGCATTGACACA                      |
| <i>Il4</i>  | ACAGGAGAAGGGACGCCAT                 | GAAGCCCTACAGACGAGCTCA                   |
| <i>Il1β</i> | CAACCAACAAGTGATATTCTCCATG           | GATCCACACTCTCCAGCTGCA                   |
| <i>Il6</i>  | GAGGATACCACTCCCAACGAGCC             | AAGTGCATCATCGTTGTTCATACA                |
| <i>Il10</i> | GGTTGCCAAGCCTTATCGGA                | ACCTGCTCCACTGCCTTGCT                    |
| <i>Il22</i> | AGAACGTCTTCCAGGGTGAA                | TCCGAGGAGTCAGTGCTAAA                    |
| <i>Tgfβ</i> | TGACGTCACTGGAGTTGTACGG              | GGTTCATGTCATGGATGGTGTC                  |
| <i>Ccn1</i> | GGAGGTGGAGTTAACGAGAAAC              | GTGGTCTGAACGATGCATTTTC                  |
| <i>CypE</i> | TTCACAAACCACAATGGCACAGGG            | TGCCGTCCAGCCAATCTGTCTTAT                |
| <i>IL6</i>  | AAATTCGGTACATCCTCGACGGCA            | AGTGCCTCTTTGCTGCTTTCACAC                |
| <i>CYPE</i> | GCAGACAAGGTCCCAAAGACA               | CACCCTGACACATAAACCCCTG                  |

**Supplementary Table 1. List of primer sequences used for qRT-PCR.**
